# Supplementary material for: Effects of Two Cannabidiol Oil Products on Self-Reported Stress Relief: A Quasi-Experimental Study
Source: PubMed Central journal article supplement — Med Cannabis Cannabinoids. 2023 Nov 6;6(1):138–47. doi: 10.1159/000531886 (PMC10629851; doi:10.1159/000531886), 2023-11-06
Supplement: Supplementary_material-Suppl.1-s1.pdf [file Supplementary_material-Suppl.1-s1.pdf]

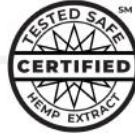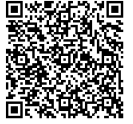

License No. 800025015  
FL License # CMTL-0003  
CLIA No. 10D1094068

# Certificate of Analysis

## Compliance Test

**Balanced Health Botanicals**  
1500 W Hampden Ave  
Sheridan, CO 80110

Batch # 3211030  
Batch Date: 2021-04-15  
Extracted From: Industrial Hemp

Sampling Method: MSP 7.3.1 Test Reg  
State: Florida

Order # BAL210415-020064  
Order Date: 2021-04-15  
Sample # AABF362

Sampling Date: 2021-04-22  
Lab Batch Date: 2021-04-22  
Completion Date: 2021-04-27

Initial Gross Weight: 81.564 g  
Net Weight: 30.004 g  
Density: 0.9421 g/ml

Number of Units: 1  
Net Weight per Unit: 30004.000 mg

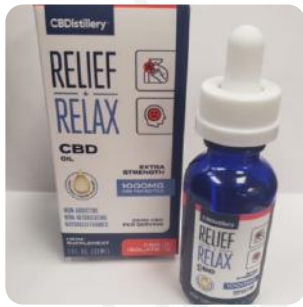

Product Image

- Potency Tested
- Heavy Metals Passed
- Mycotoxins Passed
- Pesticides Passed
- Residual Solvents Passed
- Water Activity Tested
- Listeria Monocytogenes Passed
- Pathogenic Passed

### Potency - 11

Specimen Weight: 93.190 mg

| Analyte     | Dilution (1:n) | LOD (%)  | LOQ (%) | Result (mg/ml) | (%)   |
|-------------|----------------|----------|---------|----------------|-------|
| CBD         | 1000.000       | 0.000054 | 0.001   | 35.140         | 3.730 |
| CBC         | 1000.000       | 0.000018 | 0.001   | <LOQ           | <LOQ  |
| THCV        | 1000.000       | 0.000007 | 0.001   | <LOQ           | <LOQ  |
| Delta-9 THC | 1000.000       | 0.000013 | 0.001   | <LOQ           | <LOQ  |
| Delta-8 THC | 1000.000       | 0.000026 | 0.001   | <LOQ           | <LOQ  |
| CBN         | 1000.000       | 0.000014 | 0.001   | <LOQ           | <LOQ  |
| CBGA        | 1000.000       | 0.000008 | 0.001   | <LOQ           | <LOQ  |
| CBG         | 1000.000       | 0.000248 | 0.001   | <LOQ           | <LOQ  |
| CBDV        | 1000.000       | 0.000065 | 0.001   | <LOQ           | <LOQ  |
| CBDA        | 1000.000       | 0.000001 | 0.001   | <LOQ           | <LOQ  |
| THCA-A      | 1000.000       | 0.000032 | 0.001   | <LOQ           | <LOQ  |

### Tested (HPLC/LC/MS)

### Potency Summary

|                                     |                                             |
|-------------------------------------|---------------------------------------------|
| Total THC<br>None Detected          | Total CBD<br>3.730%<br>1,054.350mg          |
| Total CBG<br>None Detected          | Total CBN<br>None Detected                  |
| Other Cannabinoids<br>None Detected | Total Cannabinoids<br>3.730%<br>1,054.350mg |

*Xueli Gao*  
Xueli Gao Lab Toxicologist  
Ph.D., DABT

*Aixia Sun*  
Aixia Sun Lab Director/Principal Scientist  
D.H.Sc., M.Sc., B.Sc., MT (AAB)

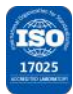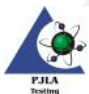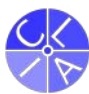

Definitions and Abbreviations used in this report: \*Total CBD = CBD + (CBD-A \* 0.877), \*Total THC = THCA-A \* 0.877 + Delta 9 THC, \*CBG Total = (CBGA \* 0.877) + CBG, \*CBN Total = (CBNA \* 0.877) + CBN, \*Other Cannabinoids Total = CBC + CBDV + THCV + THCV-A, \*Total Detected Cannabinoids = CBD Total + CBG Total + CBN Total + THC Total + CBC + CBDV + THCV + THCV-A, \*Analyte Details above show the Dry Weight Concentrations unless specified as 12% moisture concentration. (mg/ml) = Milligrams per Milliliter, LOQ = Limit of Quantitation, LOD = Limit of Detection, Dilution = Dilution Factor (ppb) = Parts per Billion, (%) = Percent, (cfu/g) = Colony Forming Unit per Gram (cfu/g) = Colony Forming Unit per Gram, LOD = Limit of Detection, (µg/g) = Microgram per Gram (ppm) = Parts per Million, (ppm) = (µg/g), (aw) = aw (area ratio) = Area Ratio, (mg/Kg) = Milligram per Kilogram, \*Measurement of Uncertainty = +/- 5%

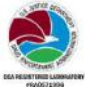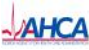

This report shall not be reproduced, without written approval, from ACS Laboratory. The results of this report relate only to the material or product analyzed. Test results are confidential unless explicitly waived otherwise. Accredited by a third-party accrediting body as a competent testing laboratory pursuant to ISO/IEC 17025 of the International Organization for Standardization.

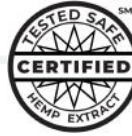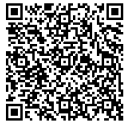

License No. 800025015  
FL License # CMTL-0003  
CLIA No. 10D1094068

## Certificate of Analysis

Compliance Test

**Balanced Health Botanicals**  
1500 W Hampden Ave  
Sheridan, CO 80110

Batch # 3211030  
Batch Date: 2021-04-15  
Extracted From: Industrial Hemp

Sampling Method: MSP 7.3.1 Test Reg  
State: Florida

Order # BAL210415-020064  
Order Date: 2021-04-15  
Sample # AABF362

Sampling Date: 2021-04-22  
Lab Batch Date: 2021-04-22  
Completion Date: 2021-04-27

Initial Gross Weight: 81.564 g  
Net Weight: 30.004 g  
Density: 0.9421 g/ml

Number of Units: 1  
Net Weight per Unit: 30004.000 mg

### Heavy Metals

Specimen Weight: 246.700 mg

Passed  
(ICP-MS)

Dilution Factor: 2.000

| Analyte      | LOQ (ppb) | Action Level (ppb) | Result (ppb) | Analyte      | LOQ (ppb) | Action Level (ppb) | Result (ppb) |
|--------------|-----------|--------------------|--------------|--------------|-----------|--------------------|--------------|
| Arsenic (As) | 100       | 1500               | <LOQ         | Cadmium (Cd) | 100       | 500                | <LOQ         |
| Lead (Pb)    | 100       | 500                | <LOQ         | Mercury (Hg) | 100       | 3000               | <LOQ         |

### Mycotoxins

Specimen Weight: 199.540 mg

Passed  
(LCMS)

Dilution Factor: 7.517

| Analyte      | LOQ (ppb) | Action Level (ppb) | Result (ppb) | Analyte      | LOQ (ppb) | Action Level (ppb) | Result (ppb) |
|--------------|-----------|--------------------|--------------|--------------|-----------|--------------------|--------------|
| Aflatoxin B1 | 6         | 20                 | <LOQ         | Aflatoxin B2 | 6         | 20                 | <LOQ         |
| Aflatoxin G1 | 6         | 20                 | <LOQ         | Aflatoxin G2 | 6         | 20                 | <LOQ         |
| Ochratoxin A | 12        | 20                 | <LOQ         |              |           |                    |              |

*Xueli Gao*  
Xueli Gao Lab Toxicologist  
Ph.D., DABT

*Aixia Sun*  
Aixia Sun Lab Director/Principal Scientist  
D.H.Sc., M.Sc., B.Sc., MT (AAB)

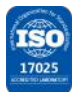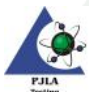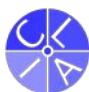

Definitions and Abbreviations used in this report: \*Total CBD = CBD + (CBD-A \* 0.877), \*Total THC = THCA-A \* 0.877 + Delta 9 THC, \*CBG Total = (CBGA \* 0.877) + CBG, \*CBN Total = (CBNA \* 0.877) + CBN, \*Other Cannabinoids Total = CBC + CBDV + THCV + THCV-A, \*Total Detected Cannabinoids = CBD Total + CBG Total + CBN Total + THC Total + CBC + CBDV + THCV + THCV-A, \*Analyte Details above show the Dry Weight Concentrations unless specified as 12% moisture concentration. (mg/ml) = Milligrams per Milliliter, LOQ = Limit of Quantitation, LOD = Limit of Detection, Dilution = Dilution Factor (ppb) = Parts per Billion, (%) = Percent, (cfu/g) = Colony Forming Unit per Gram (cfu/g) = Colony Forming Unit per Gram, , LOD = Limit of Detection, (µg/g) = Microgram per Gram (ppm) = Parts per Million, (ppm) = (µg/g), (aw) = aw (area ratio) = Area Ratio, (mg/Kg) = Milligram per Kilogram, \*Measurement of Uncertainty = +/- 5%

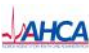

This report shall not be reproduced, without written approval, from ACS Laboratory. The results of this report relate only to the material or product analyzed. Test results are confidential unless explicitly waived otherwise. Accredited by a third-party accrediting body as a competent testing laboratory pursuant to ISO/IEC 17025 of the International Organization for Standardization.

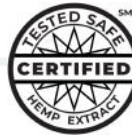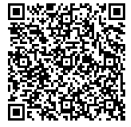

License No. 800025015  
FL License # CMTL-0003  
CLIA No. 10D1094068

# Certificate of Analysis

Compliance Test

**Balanced Health Botanicals**  
1500 W Hampden Ave  
Sheridan, CO 80110

Batch # 3211030  
Batch Date: 2021-04-15  
Extracted From: Industrial Hemp

Sampling Method: MSP 7.3.1 Test Reg  
State: Florida

Order # BAL210415-020064  
Order Date: 2021-04-15  
Sample # AABF362

Sampling Date: 2021-04-22  
Lab Batch Date: 2021-04-22  
Completion Date: 2021-04-27

Initial Gross Weight: 81.564 g  
Net Weight: 30.004 g  
Density: 0.9421 g/ml

Number of Units: 1  
Net Weight per Unit: 30004.000 mg

## Pesticides FL V4

Specimen Weight: 199.540 mg

**Passed**  
(LCMS/GCMS)

Dilution Factor: 7.517

| Analyte             | LOQ (ppb) | Action Level (ppb) | Result (ppb) | Analyte                 | LOQ (ppb) | Action Level (ppb) | Result (ppb) |
|---------------------|-----------|--------------------|--------------|-------------------------|-----------|--------------------|--------------|
| Abamectin           | 28.23     | 300                | <LOQ         | Acephate                | 30        | 3000               | <LOQ         |
| Acequinocyl         | 48        | 2000               | <LOQ         | Acetamiprid             | 30        | 3000               | <LOQ         |
| Aldicarb            | 30        | 100                | <LOQ         | Azoxystrobin            | 10        | 3000               | <LOQ         |
| Bifenazate          | 30        | 3000               | <LOQ         | Bifenthrin              | 30        | 500                | <LOQ         |
| Boscalid            | 10        | 3000               | <LOQ         | Captan                  | 30        | 3000               | <LOQ         |
| Carbaryl            | 10        | 500                | <LOQ         | Carbofuran              | 10        | 100                | <LOQ         |
| Chlorantraniliprole | 10        | 3000               | <LOQ         | Chlordane               | 10        | 100                | <LOQ         |
| Chlorfenapyr        | 30        | 100                | <LOQ         | Chlormequat Chloride    | 10        | 3000               | <LOQ         |
| Chlorpyrifos        | 30        | 100                | <LOQ         | Clofentezine            | 30        | 500                | <LOQ         |
| Coumaphos           | 48        | 100                | <LOQ         | Cyfluthrin              | 30        | 1000               | <LOQ         |
| Cypermethrin        | 30        | 1000               | <LOQ         | Daminozide              | 30        | 100                | <LOQ         |
| Diazinon            | 30        | 200                | <LOQ         | Dichlorvos              | 30        | 100                | <LOQ         |
| Dimethoate          | 30        | 100                | <LOQ         | Dimethomorph            | 48        | 3000               | <LOQ         |
| Ethoprophos         | 30        | 100                | <LOQ         | Etofenprox              | 30        | 100                | <LOQ         |
| Etoxazole           | 30        | 1500               | <LOQ         | Fenhexamid              | 10        | 3000               | <LOQ         |
| Fenoxycarb          | 30        | 100                | <LOQ         | Fenpyroximate           | 30        | 2000               | <LOQ         |
| Fipronil            | 30        | 100                | <LOQ         | Flonicamid              | 30        | 2000               | <LOQ         |
| Fludioxonil         | 48        | 3000               | <LOQ         | Hexythiazox             | 30        | 2000               | <LOQ         |
| Imazalil            | 30        | 100                | <LOQ         | Imidacloprid            | 30        | 3000               | <LOQ         |
| Kresoxim Methyl     | 30        | 1000               | <LOQ         | Malathion               | 30        | 2000               | <LOQ         |
| Metaxyl             | 10        | 3000               | <LOQ         | Methiocarb              | 30        | 100                | <LOQ         |
| Methomyl            | 30        | 100                | <LOQ         | methyl-Parathion        | 10        | 100                | <LOQ         |
| Mevinphos           | 10        | 100                | <LOQ         | Myclobutanil            | 30        | 3000               | <LOQ         |
| Naled               | 30        | 500                | <LOQ         | Oxamyl                  | 30        | 500                | <LOQ         |
| Paclotrazol         | 30        | 100                | <LOQ         | Pentachloronitrobenzene | 10        | 200                | <LOQ         |
| Permethrin          | 30        | 1000               | <LOQ         | Phosmet                 | 30        | 200                | <LOQ         |
| Piperonylbutoxide   | 30        | 3000               | <LOQ         | Prallethrin             | 30        | 400                | <LOQ         |
| Propiconazole       | 30        | 1000               | <LOQ         | Propoxur                | 30        | 100                | <LOQ         |
| Pyrethrins          | 30        | 1000               | <LOQ         | Pyridaben               | 30        | 3000               | <LOQ         |
| Spinetoram          | 10        | 3000               | <LOQ         | Spinosad                | 30        | 3000               | <LOQ         |
| Spiromesifen        | 30        | 3000               | <LOQ         | Spirotetramat           | 30        | 3000               | <LOQ         |
| Spiroxamine         | 30        | 100                | <LOQ         | Tebuconazole            | 30        | 1000               | <LOQ         |
| Thiacloprid         | 30        | 100                | <LOQ         | Thiamethoxam            | 30        | 1000               | <LOQ         |
| Trifloxystrobin     | 30        | 3000               | <LOQ         |                         |           |                    |              |

*Xueli Gao*  
Xueli Gao Lab Toxicologist  
Ph.D., DABT

*Aixia Sun*  
Aixia Sun Lab Director/Principal Scientist  
D.H.Sc., M.Sc., B.Sc., MT (AAB)

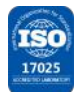

Definitions and Abbreviations used in this report: \*Total CBD = CBD + (CBD-A \* 0.877), \*Total THC = THCA-A \* 0.877 + Delta 9 THC, \*CBG Total = (CBGA \* 0.877) + CBG, \*CBN Total = (CBNA \* 0.877) + CBN, \*Other Cannabinoids Total = CBC + CBDV + THCV + THCV-A, \*Total Detected Cannabinoids = CBD Total + CBG Total + CBN Total + THC Total + CBC + CBDV + THCV + THCV-A, \*Analyte Details above show the Dry Weight Concentrations unless specified as 12% moisture concentration. (mg/ml) = Milligrams per Milliliter, LOQ = Limit of Quantitation, LOD = Limit of Detection, Dilution = Dilution Factor (ppb) = Parts per Billion, (%) = Percent, (cfu/g) = Colony Forming Unit per Gram (cfu/g) = Colony Forming Unit per Gram, , LOD = Limit of Detection, (µg/g) = Microgram per Gram (ppm) = Parts per Million, (ppm) = (µg/g), (aw) = aw (area ratio) = Area Ratio, (mg/Kg) = Milligram per Kilogram, \*Measurement of Uncertainty = +/- 5%

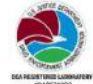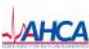

This report shall not be reproduced, without written approval, from ACS Laboratory. The results of this report relate only to the material or product analyzed. Test results are confidential unless explicitly waived otherwise. Accredited by a third-party accrediting body as a competent testing laboratory pursuant to ISO/IEC 17025 of the International Organization for Standardization.

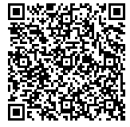

License No. 800025015  
FL License # CMTL-0003  
CLIA No. 10D1094068

# Certificate of Analysis

Compliance Test

**Balanced Health Botanicals**  
1500 W Hampden Ave  
Sheridan, CO 80110

Batch # 3211030  
Batch Date: 2021-04-15  
Extracted From: Industrial Hemp

Sampling Method: MSP 7.3.1 Test Reg  
State: Florida

Order # BAL210415-020064  
Order Date: 2021-04-15  
Sample # AABF362

Sampling Date: 2021-04-22  
Lab Batch Date: 2021-04-22  
Completion Date: 2021-04-27

Initial Gross Weight: 81.564 g  
Net Weight: 30.004 g  
Density: 0.9421 g/ml

Number of Units: 1  
Net Weight per Unit: 30004.000 mg

**Residual Solvents – FL/UT (BHB)** **Passed**  
(GCMS)

Specimen Weight: 10.300 mg

Dilution Factor: 1.000

| Analyte               | LOQ (ppm) | Action Level (ppm) | Result (ppm) | Analyte               | LOQ (ppm) | Action Level (ppm) | Result (ppm) |
|-----------------------|-----------|--------------------|--------------|-----------------------|-----------|--------------------|--------------|
| 1,1-Dichloroethene    | 0.16      | 8                  | <LOQ         | 1,2 Dimethoxyethane   | 0.04      | 100                | <LOQ         |
| 1,2-Dichloroethane    | 1.67      | 2                  | <LOQ         | 1,4 Dioxane           | 1.67      | 380                | <LOQ         |
| 1-Butanol             | 1.67      | 5000               | <LOQ         | 1-Pentanol            | 1.67      | 5000               | <LOQ         |
| 1-Propanol            | 1.67      | 5000               | <LOQ         | 2,2-dimethylbutane    | 1.67      | 290                | <LOQ         |
| 2,3-dimethylbutane    | 1.67      | 290                | <LOQ         | 2-Butanol             | 1.67      | 5000               | <LOQ         |
| 2-Butanone            | 6.4       | 5000               | <LOQ         | 2-Ethoxyethanol       | 1.67      | 160                | <LOQ         |
| 2-methylbutane        | 1.67      | 5000               | <LOQ         | 2-Methylpentane       | 1.67      | 290                | <LOQ         |
| 2-Propanol (IPA)      | 1.67      | 5000               | <LOQ         | 3-Methylpentane       | 1.67      | 290                | <LOQ         |
| Acetone               | 1.67      | 5000               | <LOQ         | Acetonitrile          | 0.02      | 410                | <LOQ         |
| Benzene               | 1.67      | 2                  | <LOQ         | Butane                | 1.67      | 2000               | <LOQ         |
| Chloroform            | 0.04      | 60                 | <LOQ         | Cumene                | 1.67      | 70                 | <LOQ         |
| Cyclohexane           | 1.67      | 3880               | <LOQ         | Dichloromethane       | 1.67      | 600                | <LOQ         |
| Dimethyl sulfoxide    | 1.67      | 5000               | <LOQ         | Ethanol               | 1.67      | 5000               | <LOQ         |
| Ethyl Acetate         | 1.11      | 5000               | <LOQ         | Ethyl Ether           | 1.39      | 5000               | <LOQ         |
| Ethylene glycol       | 1.67      | 620                | <LOQ         | Ethylene Oxide        | 0.1       | 5                  | <LOQ         |
| Heptane               | 1.67      | 5000               | <LOQ         | Heptane               | 1.67      | 5000               | <LOQ         |
| Hexane                | 1.17      | 290                | <LOQ         | Isopropyl acetate     | 1.67      | 5000               | <LOQ         |
| Isopropyl alcohol     | 1.67      | 500                | <LOQ         | Methanol              | 0.69      | 3000               | <LOQ         |
| Methylene chloride    | 2.43      | 600                | <LOQ         | Methylpropane         | 1.67      | 5000               | <LOQ         |
| N,N-dimethylacetamide | 1.67      | 1090               | <LOQ         | N,N-dimethylformamide | 1.67      | 880                | <LOQ         |
| Pentane               | 1.67      | 5000               | <LOQ         | Propane               | 1.67      | 2100               | <LOQ         |
| Pyridine              | 1.67      | 100                | <LOQ         | Sulfolane             | 1.67      | 160                | <LOQ         |
| Tetrahydrofuran       | 1.67      | 720                | <LOQ         | Toluene               | 1.67      | 890                | <LOQ         |
| Total Xylenes         | 1.67      | 1000               | <LOQ         | Trichloroethylene     | 0.49      | 80                 | <LOQ         |

*Xueli Gao*  
Xueli Gao Lab Toxicologist  
Ph.D., DABT

*Aixia Sun*  
Aixia Sun Lab Director/Principal Scientist  
D.H.Sc., M.Sc., B.Sc., MT (AAB)

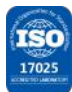

Definitions and Abbreviations used in this report: \*Total CBD = CBD + (CBD-A \* 0.877), \*Total THC = THCA-A \* 0.877 + Delta 9 THC, \*CBG Total = (CBGA \* 0.877) + CBG, \*CBN Total = (CBNA \* 0.877) + CBN, \*Other Cannabinoids Total = CBC + CBDV + THCV + THCV-A, \*Total Detected Cannabinoids = CBD Total + CBG Total + CBN Total + THC Total + CBC + CBDV + THCV + THCV-A, \*Analyte Details above show the Dry Weight Concentrations unless specified as 12% moisture concentration. (mg/ml) = Milligrams per Milliliter, LOQ = Limit of Quantitation, LOD = Limit of Detection, Dilution = Dilution Factor (ppb) = Parts per Billion, (%) = Percent, (cfu/g) = Colony Forming Unit per Gram (cfu/g) = Colony Forming Unit per Gram, , LOD = Limit of Detection, (µg/g) = Microgram per Gram (ppm) = Parts per Million, (ppm) = (µg/g), (aw) = aw (area ratio) = Area Ratio, (mg/Kg) = Milligram per Kilogram, \*Measurement of Uncertainty = +/- 5%



This report shall not be reproduced, without written approval, from ACS Laboratory. The results of this report relate only to the material or product analyzed. Test results are confidential unless explicitly waived otherwise. Accredited by a third-party accrediting body as a competent testing laboratory pursuant to ISO/IEC 17025 of the International Organization for Standardization.



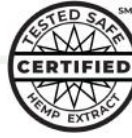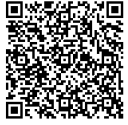

License No. 800025015  
FL License # CMTL-0003  
CLIA No. 10D1094068

# Certificate of Analysis

Compliance Test

**Balanced Health Botanicals**  
1500 W Hampden Ave  
Sheridan, CO 80110

Batch # 3211030  
Batch Date: 2021-04-15  
Extracted From: Industrial Hemp

Sampling Method: MSP 7.3.1 Test Reg  
State: Florida

Order # BAL210415-020064  
Order Date: 2021-04-15  
Sample # AABF362

Sampling Date: 2021-04-22  
Lab Batch Date: 2021-04-22  
Completion Date: 2021-04-27

Initial Gross Weight: 81.564 g  
Net Weight: 30.004 g  
Density: 0.9421 g/ml

Number of Units: 1  
Net Weight per Unit: 30004.000 mg

## Water Activity Tested (Water Activity Analyzer)

Specimen Weight: 0.500 g

Dilution Factor: 1.000

| Analyte        | Action Level (aw) | Result (aw) |
|----------------|-------------------|-------------|
| Water Activity | 0.85              | 0.241       |

## Listeria Monocytogenes Passed (qPCR)

Specimen Weight: 983.500 mg

Dilution Factor: 1.000

| Analyte                | Action Level (cfu/g) | Result        |
|------------------------|----------------------|---------------|
| Listeria Monocytogenes | 1                    | Absence in 1g |

## Pathogenic SAE (qPCR) Passed (qPCR)

Specimen Weight: 249.510 mg

Dilution Factor: 1.000

| Analyte                                         | Action Level (cfu/g) | Result (cfu/g) | Analyte    | Action Level (cfu/g) | Result (cfu/g) |
|-------------------------------------------------|----------------------|----------------|------------|----------------------|----------------|
| Aspergillus (Flavus, Fumigatus, Niger, Terreus) | 1                    | Absence in 1g  | E.Coli     | 1                    | Absence in 1g  |
|                                                 |                      |                | Salmonella | 1                    | Absence in 1g  |

*Xueli Gao*  
Xueli Gao Lab Toxicologist  
Ph.D., DABT

*Aixia Sun*  
Aixia Sun Lab Director/Principal Scientist  
D.H.Sc., M.Sc., B.Sc., MT (AAB)

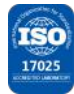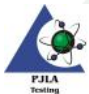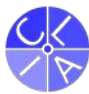

Definitions and Abbreviations used in this report: \*Total CBD = CBD + (CBD-A \* 0.877), \*Total THC = THCA-A \* 0.877 + Delta 9 THC, \*CBG Total = (CBGA \* 0.877) + CBG, \*CBN Total = (CBNA \* 0.877) + CBN, \*Other Cannabinoids Total = CBC + CBDV + THCV + THCV-A, \*Total Detected Cannabinoids = CBD Total + CBG Total + CBN Total + THC Total + CBC + CBDV + THCV + THCV-A, \*Analyte Details above show the Dry Weight Concentrations unless specified as 12% moisture concentration. (mg/ml) = Milligrams per Milliliter, LOQ = Limit of Quantitation, LOD = Limit of Detection, Dilution = Dilution Factor (ppb) = Parts per Billion, (%) = Percent, (cfu/g) = Colony Forming Unit per Gram (cfu/g) = Colony Forming Unit per Gram, , LOD = Limit of Detection, (µg/g) = Microgram per Gram (ppm) = Parts per Million, (ppm) = (µg/g), (aw) = aw (area ratio) = Area Ratio, (mg/Kg) = Milligram per Kilogram, \*Measurement of Uncertainty = +/- 5%

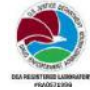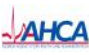

This report shall not be reproduced, without written approval, from ACS Laboratory. The results of this report relate only to the material or product analyzed. Test results are confidential unless explicitly waived otherwise. Accredited by a third-party accrediting body as a competent testing laboratory pursuant to ISO/IEC 17025 of the International Organization for Standardization.

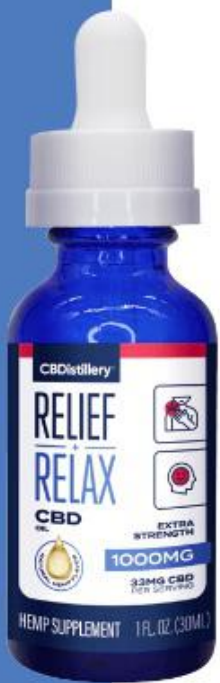

## THC-Free CBD Oil Tinture - 1000mg - 30mL

**Ingredients:** Fractionated Coconut Oil (MCT) and Cannabidiol (CBD) from Hemp Extract (Aerial Parts)

**Suggested Use:** Take 1 serving (1mL) orally. Hold under the tongue for 15-20 seconds prior to swallowing. Adjust dosage as needed. Individual results may vary.

**1000mg**

Cannabidiol (CBD) Per Bottle

**33mg**

CBD per 1mL serving

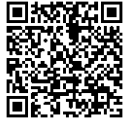

License No. 800025015  
FL License # CMTL-0003  
CLIA No. 10D1094068

# Certificate of Analysis

## Compliance Test

**Balanced Health Botanicals (BHB)**  
1500 W. HAMPDEN AVE SUITE 5H  
ENGLEWOOD, CO 80110

Batch # 2210700  
Batch Date: 2021-03-22  
Extracted From: HEMP

Sampling Method: MSP 7.3.1 Test Reg  
State: Florida

Production Date: 2021-03-22

Order # BAL210402-030001  
Order Date: 2021-04-02  
Sample # AABE035

Sampling Date: 2021-04-05  
Lab Batch Date: 2021-04-05  
Completion Date: 2021-04-09

Initial Gross Weight: 23.599 g  
Density: 0.9421 g/ml

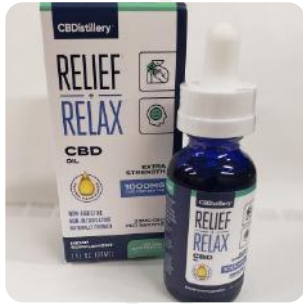

Product Image

Potency Tested

Terpenes Tested

Heavy Metals Passed

Mycotoxins Passed

Pesticides Passed

Residual Solvents Passed

Water Activity Tested

Pathogenic Microbiology Passed

Listeria Monocytogenes Passed

Pathogenic Passed

### Potency - 11

Specimen Weight: 81.900 mg

| Analyte     | Dilution (1:n) | LOD (%)  | LOQ (%) | Result (mg/ml) | (%)   |
|-------------|----------------|----------|---------|----------------|-------|
| CBD         | 10.000         | 0.000054 | 0.001   | 36.591         | 3.884 |
| CBG         | 10.000         | 0.000248 | 0.001   | 0.886          | 0.094 |
| CBDV        | 10.000         | 0.000065 | 0.001   | 0.290          | 0.031 |
| CBC         | 10.000         | 0.000018 | 0.001   | <LOQ           | <LOQ  |
| THCV        | 10.000         | 0.000007 | 0.001   | <LOQ           | <LOQ  |
| Delta-9 THC | 10.000         | 0.000013 | 0.001   | <LOQ           | <LOQ  |
| Delta-8 THC | 10.000         | 0.000026 | 0.001   | <LOQ           | <LOQ  |
| CBN         | 10.000         | 0.000014 | 0.001   | <LOQ           | <LOQ  |
| CBGA        | 10.000         | 0.00008  | 0.001   | <LOQ           | <LOQ  |
| CBDA        | 10.000         | 0.00001  | 0.001   | <LOQ           | <LOQ  |
| THCA-A      | 10.000         | 0.000032 | 0.001   | <LOQ           | <LOQ  |

### Tested (HPLC/LCMS)

### Potency Summary

|                              |                              |
|------------------------------|------------------------------|
| Total THC<br>None Detected   | Total CBD<br>3.884%          |
| Total CBG<br>0.094%          | Total CBN<br>None Detected   |
| Other Cannabinoids<br>0.031% | Total Cannabinoids<br>4.009% |

### Terpenes Summary

| Analyte          | Result (mg/ml) | (%)    |
|------------------|----------------|--------|
| alpha-Terpinene  | 2.24           | 0.224% |
| Pulegone         | 0.84           | 0.084% |
| (R)-(+)-Limonene | 0.73           | 0.073% |

**Total Terpenes: 0.381%**

Detailed Terpenes Analysis is on the following page

Xueli Gao  
Ph.D., DABT  
Lab Toxicologist

Aixia Sun  
D.H.Sc., M.Sc., B.Sc., MT (AAB)  
Lab Director/Principal Scientist

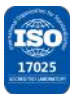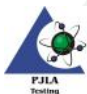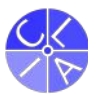

Definitions and Abbreviations used in this report: \*Total CBD = CBD + (CBD-A \* 0.877), \*Total THC = THCA-A \* 0.877 + Delta 9 THC, \*CBG Total = (CBGA \* 0.877) + CBG, \*CBN Total = (CBNA \* 0.877) + CBN, \*Other Cannabinoids Total = CBC + CBDV + THCV + THCV-A, \*Total Detected Cannabinoids = CBD Total + CBG Total + CBN Total + THC Total + CBC + CBDV + THCV + THCV-A, \*Analyte Details above show the Dry Weight Concentrations unless specified as 12% moisture concentration. (mg/ml) = Milligrams per Milliliter, LOQ = Limit of Quantitation, LOD = Limit of Detection, Dilution = Dilution Factor (ppb) = Parts per Billion, (%) = Percent, (cfu/g) = Colony Forming Unit per Gram (cfu/g) = Colony Forming Unit per Gram, , LOD = Limit of Detection, (µg/g) = Microgram per Gram (ppm) = Parts per Million, (ppm) = (µg/g), (aw) = aw (area ratio) = Area Ratio, (mg/Kg) = Milligram per Kilogram, \*Measurement of Uncertainty = +/- 5%

This report shall not be reproduced, without written approval, from ACS Laboratory. The results of this report relate only to the material or product analyzed. Test results are confidential unless explicitly waived otherwise. Accredited by a third-party accrediting body as a competent testing laboratory pursuant to ISO/IEC 17025 of the International Organization for Standardization.

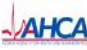

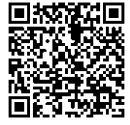

License No. 800025015  
FL License # CMTL-0003  
CLIA No. 10D1094068

# Certificate of Analysis

Compliance Test

**Balanced Health Botanicals (BHB)**  
1500 W. HAMPDEN AVE SUITE 5H  
ENGLEWOOD, CO 80110

Batch # 2210700  
Batch Date: 2021-03-22  
Extracted From: HEMP

Sampling Method: MSP 7.3.1 Test Reg  
State: Florida

Production Date: 2021-03-22

Order # BAL210402-030001  
Order Date: 2021-04-02  
Sample # AABE035

Sampling Date: 2021-04-05  
Lab Batch Date: 2021-04-05  
Completion Date: 2021-04-09

Initial Gross Weight: 23.599 g  
Density: 0.9421 g/ml

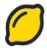

## Terpenes - FL

Specimen Weight: 1926.090 mg

Tested (GC/GCMS)

Dilution Factor: 250.000

| Analyte             | LOQ (%) | Result (mg/g) | (%)   | Analyte             | LOQ (%) | Result (mg/g) | (%)   |
|---------------------|---------|---------------|-------|---------------------|---------|---------------|-------|
| alpha-Terpinene     | 0.02    | 2.240         | 0.224 | Pulegone            | 0.02    | 0.840         | 0.084 |
| (R)-(+)-Limonene    | 0.02    | 0.730         | 0.073 | Geranyl acetate     | 0.02    | <LOQ          | <LOQ  |
| Guaiaol             | 0.02    | <LOQ          | <LOQ  | Hexahydrothymol     | 0.02    | <LOQ          | <LOQ  |
| Isoborneol          | 0.02    | <LOQ          | <LOQ  | Isopulegol          | 0.02    | <LOQ          | <LOQ  |
| Linalool            | 0.02    | <LOQ          | <LOQ  | Nerol               | 0.02    | <LOQ          | <LOQ  |
| (+)-Cedrol          | 0.02    | <LOQ          | <LOQ  | Ocimene             | 0.014   | <LOQ          | <LOQ  |
| Geraniol            | 0.02    | <LOQ          | <LOQ  | Sabinene Hydrate    | 0.02    | <LOQ          | <LOQ  |
| Terpineol           | 0.02    | <LOQ          | <LOQ  | Terpinolene         | 0.02    | <LOQ          | <LOQ  |
| trans-Caryophyllene | 0.02    | <LOQ          | <LOQ  | trans-Nerolidol     | 0.02    | <LOQ          | <LOQ  |
| Sabinene            | 0.02    | <LOQ          | <LOQ  | Fenchone            | 0.02    | <LOQ          | <LOQ  |
| Gamma-Terpinene     | 0.02    | <LOQ          | <LOQ  | beta-Myrcene        | 0.02    | <LOQ          | <LOQ  |
| 3-Carene            | 0.02    | <LOQ          | <LOQ  | alpha-Bisabolol     | 0.02    | <LOQ          | <LOQ  |
| alpha-Cedrene       | 0.02    | <LOQ          | <LOQ  | alpha-Humulene      | 0.02    | <LOQ          | <LOQ  |
| alpha-Phellandrene  | 0.02    | <LOQ          | <LOQ  | alpha-Pinene        | 0.02    | <LOQ          | <LOQ  |
| beta-Pinene         | 0.02    | <LOQ          | <LOQ  | Fenchyl Alcohol     | 0.02    | <LOQ          | <LOQ  |
| Borneol             | 0.04    | <LOQ          | <LOQ  | Camphene            | 0.02    | <LOQ          | <LOQ  |
| Camphors            | 0.04    | <LOQ          | <LOQ  | Caryophyllene oxide | 0.02    | <LOQ          | <LOQ  |
| cis-Nerolidol       | 0.02    | <LOQ          | <LOQ  | Eucalyptol          | 0.02    | <LOQ          | <LOQ  |
| Farnesene           | 0.02    | <LOQ          | <LOQ  | Valencene           | 0.02    | <LOQ          | <LOQ  |

Total Terpenes: 0.381%

Xueli Gao  
Ph.D., DABT  
Lab Toxicologist

Aixia Sun  
D.H.Sc., M.Sc., B.Sc., MT (AAB)  
Lab Director/Principal Scientist



Definitions and Abbreviations used in this report: \*Total CBD = CBD + (CBD-A \* 0.877), \*Total THC = THCA-A \* 0.877 + Delta 9 THC, \*CBG Total = (CBGA \* 0.877) + CBG, \*CBN Total = (CBNA \* 0.877) + CBN, \*Other Cannabinoids Total = CBC + CBDV + THCV + THCV-A, \*Total Detected Cannabinoids = CBD Total + CBG Total + CBN Total + THC Total + CBC + CBDV + THCV + THCV-A, \*Analyte Details above show the Dry Weight Concentrations unless specified as 12% moisture concentration. (mg/ml) = Milligrams per Milliliter, LOQ = Limit of Quantitation, LOD = Limit of Detection, Dilution = Dilution Factor (ppb) = Parts per Billion, (%) = Percent, (cfu/g) = Colony Forming Unit per Gram (cfu/g) = Colony Forming Unit per Gram, , LOD = Limit of Detection, (µg/g) = Microgram per Gram (ppm) = Parts per Million, (ppm) = (µg/g), (aw) = aw (area ratio) = Area Ratio, (mg/Kg) = Milligram per Kilogram, \*Measurement of Uncertainty = +/- 5%

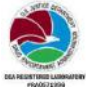

This report shall not be reproduced, without written approval, from ACS Laboratory. The results of this report relate only to the material or product analyzed. Test results are confidential unless explicitly waived otherwise. Accredited by a third-party accrediting body as a competent testing laboratory pursuant to ISO/IEC 17025 of the International Organization for Standardization.



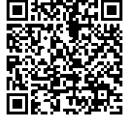

License No. 800025015  
FL License # CMTL-0003  
CLIA No. 10D1094068

# Certificate of Analysis

Compliance Test

**Balanced Health Botanicals (BHB)**  
1500 W. HAMPDEN AVE SUITE 5H  
ENGLEWOOD, CO 80110

Batch # 2210700  
Batch Date: 2021-03-22  
Extracted From: HEMP

Sampling Method: MSP 7.3.1 Test Reg  
State: Florida

Production Date: 2021-03-22

Order # BAL210402-030001  
Order Date: 2021-04-02  
Sample # AABE035

Sampling Date: 2021-04-05  
Lab Batch Date: 2021-04-05  
Completion Date: 2021-04-09

Initial Gross Weight: 23.599 g  
Density: 0.9421 g/ml

## Heavy Metals

Specimen Weight: 246.660 mg

Passed (ICP-MS)

Dilution Factor: 2.000

| Analyte      | LOQ (ppb) | Action Level (ppb) | Result (ppb) | Analyte      | LOQ (ppb) | Action Level (ppb) | Result (ppb) |
|--------------|-----------|--------------------|--------------|--------------|-----------|--------------------|--------------|
| Arsenic (As) | 100       | 1500               | <LOQ         | Cadmium (Cd) | 100       | 500                | <LOQ         |
| Lead (Pb)    | 100       | 500                | <LOQ         | Mercury (Hg) | 100       | 3000               | <LOQ         |

## Mycotoxins

Specimen Weight: 168.200 mg

Passed (LCMS)

Dilution Factor: 8.918

| Analyte      | LOQ (ppb) | Action Level (ppb) | Result (ppb) | Analyte      | LOQ (ppb) | Action Level (ppb) | Result (ppb) |
|--------------|-----------|--------------------|--------------|--------------|-----------|--------------------|--------------|
| Aflatoxin B1 | 6         | 20                 | <LOQ         | Aflatoxin B2 | 6         | 20                 | <LOQ         |
| Aflatoxin G1 | 6         | 20                 | <LOQ         | Aflatoxin G2 | 6         | 20                 | <LOQ         |
| Ochratoxin A | 12        | 20                 | <LOQ         |              |           |                    |              |

*Xueli Gao*  
Xueli Gao Lab Toxicologist  
Ph.D., DABT

*Aixia Sun*  
Aixia Sun Lab Director/Principal Scientist  
D.H.Sc., M.Sc., B.Sc., MT (AAB)

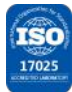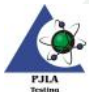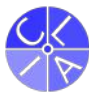

Definitions and Abbreviations used in this report: \*Total CBD = CBD + (CBD-A \* 0.877), \*Total THC = THCA-A \* 0.877 + Delta 9 THC, \*CBG Total = (CBGA \* 0.877) + CBG, \*CBN Total = (CBNA \* 0.877) + CBN, \*Other Cannabinoids Total = CBC + CBDV + THCV + THCV-A, \*Total Detected Cannabinoids = CBD Total + CBG Total + CBN Total + THC Total + CBC + CBDV + THCV + THCV-A, \*Analyte Details above show the Dry Weight Concentrations unless specified as 12% moisture concentration. (mg/ml) = Milligrams per Milliliter, LOQ = Limit of Quantitation, LOD = Limit of Detection, Dilution = Dilution Factor (ppb) = Parts per Billion, (%) = Percent, (cfu/g) = Colony Forming Unit per Gram (cfu/g) = Colony Forming Unit per Gram, , LOD = Limit of Detection, (µg/g) = Microgram per Gram (ppm) = Parts per Million, (ppm) = (µg/g), (aw) = aw (area ratio) = Area Ratio, (mg/Kg) = Milligram per Kilogram, \*Measurement of Uncertainty = +/- 5%



This report shall not be reproduced, without written approval, from ACS Laboratory. The results of this report relate only to the material or product analyzed. Test results are confidential unless explicitly waived otherwise. Accredited by a third-party accrediting body as a competent testing laboratory pursuant to ISO/IEC 17025 of the International Organization for Standardization.

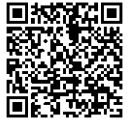

License No. 800025015  
FL License # CMTL-0003  
CLIA No. 10D1094068

# Certificate of Analysis

Compliance Test

**Balanced Health Botanicals (BHB)**  
1500 W. HAMPDEN AVE SUITE 5H  
ENGLEWOOD, CO 80110

Batch # 2210700  
Batch Date: 2021-03-22  
Extracted From: HEMP

Sampling Method: MSP 7.3.1 Test Reg  
State: Florida

Production Date: 2021-03-22

Order # BAL210402-030001  
Order Date: 2021-04-02  
Sample # AABE035

Sampling Date: 2021-04-05  
Lab Batch Date: 2021-04-05  
Completion Date: 2021-04-09

Initial Gross Weight: 23.599 g  
Density: 0.9421 g/ml

**Pesticides FL V4** **Passed**  
(LCMS/GCMS)  
Specimen Weight: 168.200 mg

Dilution Factor: 8.918

| Analyte             | LOQ (ppb) | Action Level (ppb) | Result (ppb) | Analyte                 | LOQ (ppb) | Action Level (ppb) | Result (ppb) |
|---------------------|-----------|--------------------|--------------|-------------------------|-----------|--------------------|--------------|
| Abamectin           | 28.23     | 300                | <LOQ         | Acephate                | 30        | 3000               | <LOQ         |
| Acequinocyl         | 48        | 2000               | <LOQ         | Acetamiprid             | 30        | 3000               | <LOQ         |
| Aldicarb            | 30        | 100                | <LOQ         | Azoxystrobin            | 10        | 3000               | <LOQ         |
| Bifenazate          | 30        | 3000               | <LOQ         | Bifenthrin              | 30        | 500                | <LOQ         |
| Boscalid            | 10        | 3000               | <LOQ         | Captan                  | 30        | 3000               | <LOQ         |
| Carbaryl            | 10        | 500                | <LOQ         | Carbofuran              | 10        | 100                | <LOQ         |
| Chlorantraniliprole | 10        | 3000               | <LOQ         | Chlordane               | 10        | 100                | <LOQ         |
| Chlorfenapyr        | 30        | 100                | <LOQ         | Chloromequat Chloride   | 10        | 3000               | <LOQ         |
| Chlorpyrifos        | 30        | 100                | <LOQ         | Clofentezine            | 30        | 500                | <LOQ         |
| Coumaphos           | 48        | 100                | <LOQ         | Cyfluthrin              | 30        | 1000               | <LOQ         |
| Cypermethrin        | 30        | 1000               | <LOQ         | Daminozide              | 30        | 100                | <LOQ         |
| Diazinon            | 30        | 200                | <LOQ         | Dichlorvos              | 30        | 100                | <LOQ         |
| Dimethoate          | 30        | 100                | <LOQ         | Dimethomorph            | 48        | 3000               | <LOQ         |
| Ethoprophos         | 30        | 100                | <LOQ         | Etofenprox              | 30        | 100                | <LOQ         |
| Etoxazole           | 30        | 1500               | <LOQ         | Fenhexamid              | 10        | 3000               | <LOQ         |
| Fenoxycarb          | 30        | 100                | <LOQ         | Fenpyroximate           | 30        | 2000               | <LOQ         |
| Fipronil            | 30        | 100                | <LOQ         | Flonicamid              | 30        | 2000               | <LOQ         |
| Fludioxonil         | 48        | 3000               | <LOQ         | Hexythiazox             | 30        | 2000               | <LOQ         |
| Imazalil            | 30        | 100                | <LOQ         | Imidacloprid            | 30        | 3000               | <LOQ         |
| Kresoxim Methyl     | 30        | 1000               | <LOQ         | Malathion               | 30        | 2000               | <LOQ         |
| Metaxyl             | 10        | 3000               | <LOQ         | Methiocarb              | 30        | 100                | <LOQ         |
| Methomyl            | 30        | 100                | <LOQ         | methyl-Parathion        | 10        | 100                | <LOQ         |
| Mevinphos           | 10        | 100                | <LOQ         | Myclobutanil            | 30        | 3000               | <LOQ         |
| Naled               | 30        | 500                | <LOQ         | Oxamyl                  | 30        | 500                | <LOQ         |
| Paclbutrazol        | 30        | 100                | <LOQ         | Pentachloronitrobenzene | 10        | 200                | <LOQ         |
| Permethrin          | 30        | 1000               | <LOQ         | Phosmet                 | 30        | 200                | <LOQ         |
| Piperonylbutoxide   | 30        | 3000               | <LOQ         | Prallethrin             | 30        | 400                | <LOQ         |
| Propiconazole       | 30        | 1000               | <LOQ         | Propoxur                | 30        | 100                | <LOQ         |
| Pyrethrins          | 30        | 1000               | <LOQ         | Pyridaben               | 30        | 3000               | <LOQ         |
| Spinetoram          | 10        | 3000               | <LOQ         | Spinosad                | 30        | 3000               | <LOQ         |
| Spiromesifen        | 30        | 3000               | <LOQ         | Spirotetramat           | 30        | 3000               | <LOQ         |
| Spiroxamine         | 30        | 100                | <LOQ         | Tebuconazole            | 30        | 1000               | <LOQ         |
| Thiacloprid         | 30        | 100                | <LOQ         | Thiamethoxam            | 30        | 1000               | <LOQ         |
| Trifloxystrobin     | 30        | 3000               | <LOQ         |                         |           |                    |              |

*Xueli Gao*  
Xueli Gao Lab Toxicologist  
Ph.D., DABT

*Aixia Sun*  
Aixia Sun Lab Director/Principal Scientist  
D.H.Sc., M.Sc., B.Sc., MT (AAB)

Definitions and Abbreviations used in this report: \*Total CBD = CBD + (CBD-A \* 0.877), \*Total THC = THCA-A \* 0.877 + Delta 9 THC, \*CBG Total = (CBGA \* 0.877) + CBG, \*CBN Total = (CBNA \* 0.877) + CBN, \*Other Cannabinoids Total = CBC + CBDV + THCV + THCV-A, \*Total Detected Cannabinoids = CBD Total + CBG Total + CBN Total + THC Total + CBC + CBDV + THCV + THCV-A, \*Analyte Details above show the Dry Weight Concentrations unless specified as 12% moisture concentration. (mg/ml) = Milligrams per Milliliter, LOQ = Limit of Quantitation, LOD = Limit of Detection, Dilution = Dilution Factor (ppb) = Parts per Billion, (%) = Percent, (cfu/g) = Colony Forming Unit per Gram (cfu/g) = Colony Forming Unit per Gram, LOD = Limit of Detection, (µg/g) = Microgram per Gram (ppm) = Parts per Million, (ppm) = (µg/g), (aw) = aw (area ratio) = Area Ratio, (mg/Kg) = Milligram per Kilogram, \*Measurement of Uncertainty = +/- 5%

This report shall not be reproduced, without written approval, from ACS Laboratory. The results of this report relate only to the material or product analyzed. Test results are confidential unless explicitly waived otherwise. Accredited by a third-party accrediting body as a competent testing laboratory pursuant to ISO/IEC 17025 of the International Organization for Standardization.

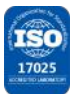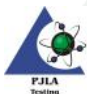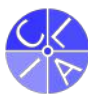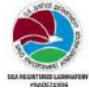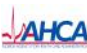

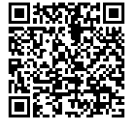

License No. 800025015  
FL License # CMTL-0003  
CLIA No. 10D1094068

# Certificate of Analysis

Compliance Test

**Balanced Health Botanicals (BHB)**  
1500 W. HAMPDEN AVE SUITE 5H  
ENGLEWOOD, CO 80110

Batch # 2210700  
Batch Date: 2021-03-22  
Extracted From: HEMP

Sampling Method: MSP 7.3.1 Test Reg  
State: Florida

Production Date: 2021-03-22

Order # BAL210402-030001  
Order Date: 2021-04-02  
Sample # AABE035

Sampling Date: 2021-04-05  
Lab Batch Date: 2021-04-05  
Completion Date: 2021-04-09

Initial Gross Weight: 23.599 g  
Density: 0.9421 g/ml

**Residual Solvents – FL/UT (BHB)** **Passed (GCMS)**

Specimen Weight: 11.700 mg

Dilution Factor: 1.000

| Analyte               | LOQ (ppm) | Action Level (ppm) | Result (ppm) | Analyte               | LOQ (ppm) | Action Level (ppm) | Result (ppm) |
|-----------------------|-----------|--------------------|--------------|-----------------------|-----------|--------------------|--------------|
| 1,1-Dichloroethene    | 0.16      | 8                  | <LOQ         | 1,2 Dimethoxyethane   | 0.04      | 100                | <LOQ         |
| 1,2-Dichloroethane    | 1.67      | 2                  | <LOQ         | 1,4 Dioxane           | 1.67      | 380                | <LOQ         |
| 1-Butanol             | 1.67      | 5000               | <LOQ         | 1-Pentanol            | 1.67      | 5000               | <LOQ         |
| 1-Propanol            | 1.67      | 5000               | <LOQ         | 2,2-dimethylbutane    | 1.67      | 290                | <LOQ         |
| 2,3-dimethylbutane    | 1.67      | 290                | <LOQ         | 2-Butanol             | 1.67      | 5000               | <LOQ         |
| 2-Butanone            | 6.4       | 5000               | <LOQ         | 2-Ethoxyethanol       | 1.67      | 160                | <LOQ         |
| 2-methylbutane        | 1.67      | 5000               | <LOQ         | 2-Methylpentane       | 1.67      | 290                | <LOQ         |
| 2-Propanol (IPA)      | 1.67      | 5000               | <LOQ         | 3-Methylpentane       | 1.67      | 290                | <LOQ         |
| Acetone               | 1.67      | 5000               | <LOQ         | Acetonitrile          | 0.02      | 410                | <LOQ         |
| Benzene               | 1.67      | 2                  | <LOQ         | Butane                | 1.67      | 2000               | <LOQ         |
| Chloroform            | 0.04      | 60                 | <LOQ         | Cumene                | 1.67      | 70                 | <LOQ         |
| Cyclohexane           | 1.67      | 3880               | <LOQ         | Dichloromethane       | 1.67      | 600                | <LOQ         |
| Dimethyl sulfoxide    | 1.67      | 5000               | <LOQ         | Ethanol               | 1.67      | 5000               | <LOQ         |
| Ethyl Acetate         | 1.11      | 5000               | <LOQ         | Ethyl Ether           | 1.39      | 5000               | <LOQ         |
| Ethylene glycol       | 1.67      | 620                | <LOQ         | Ethylene Oxide        | 0.1       | 5                  | <LOQ         |
| Heptane               | 1.67      | 5000               | <LOQ         | Heptane               | 1.67      | 5000               | <LOQ         |
| Hexane                | 1.17      | 290                | <LOQ         | Isopropyl acetate     | 1.67      | 5000               | <LOQ         |
| Isopropyl alcohol     | 1.67      | 500                | <LOQ         | Methanol              | 0.69      | 3000               | <LOQ         |
| Methylene chloride    | 2.43      | 600                | <LOQ         | Methylpropane         | 1.67      | 5000               | <LOQ         |
| N,N-dimethylacetamide | 1.67      | 1090               | <LOQ         | N,N-dimethylformamide | 1.67      | 880                | <LOQ         |
| Pentane               | 1.67      | 5000               | <LOQ         | Propane               | 1.67      | 2100               | <LOQ         |
| Pyridine              | 1.67      | 100                | <LOQ         | Sulfolane             | 1.67      | 160                | <LOQ         |
| Tetrahydrofuran       | 1.67      | 720                | <LOQ         | Toluene               | 1.67      | 890                | <LOQ         |
| Total Xylenes         | 1.67      | 1000               | <LOQ         | Trichloroethylene     | 0.49      | 80                 | <LOQ         |

*Xueli Gao*  
Xueli Gao Lab Toxicologist  
Ph.D., DABT

*Aixia Sun*  
Aixia Sun Lab Director/Principal Scientist  
D.H.Sc., M.Sc., B.Sc., MT (AAB)



Definitions and Abbreviations used in this report: \*Total CBD = CBD + (CBD-A \* 0.877), \*Total THC = THCA-A \* 0.877 + Delta 9 THC, \*CBG Total = (CBGA \* 0.877) + CBG, \*CBN Total = (CBNA \* 0.877) + CBN, \*Other Cannabinoids Total = CBC + CBDV + THCV + THCV-A, \*Total Detected Cannabinoids = CBD Total + CBG Total + CBN Total + THC Total + CBC + CBDV + THCV + THCV-A, \*Analyte Details above show the Dry Weight Concentrations unless specified as 12% moisture concentration. (mg/ml) = Milligrams per Milliliter, LOQ = Limit of Quantitation, LOD = Limit of Detection, Dilution = Dilution Factor (ppb) = Parts per Billion, (%) = Percent, (cfu/g) = Colony Forming Unit per Gram (cfu/g) = Colony Forming Unit per Gram, LOD = Limit of Detection, (µg/g) = Microgram per Gram (ppm) = Parts per Million, (ppm) = (µg/g), (aw) = aw (area ratio) = Area Ratio, (mg/Kg) = Milligram per Kilogram, \*Measurement of Uncertainty = +/- 5%



This report shall not be reproduced, without written approval, from ACS Laboratory. The results of this report relate only to the material or product analyzed. Test results are confidential unless explicitly waived otherwise. Accredited by a third-party accrediting body as a competent testing laboratory pursuant to ISO/IEC 17025 of the International Organization for Standardization.



License No. 800025015  
FL License # CMTL-0003  
CLIA No. 10D1094068

## Certificate of Analysis

Compliance Test

**Balanced Health Botanicals (BHB)**  
1500 W. HAMPDEN AVE SUITE 5H  
ENGLEWOOD, CO 80110

Batch # 2210700  
Batch Date: 2021-03-22  
Extracted From: HEMP

Sampling Method: MSP 7.3.1 Test Reg  
State: Florida

Production Date: 2021-03-22

Order # BAL210402-030001  
Order Date: 2021-04-02  
Sample # AABE035

Sampling Date: 2021-04-05  
Lab Batch Date: 2021-04-05  
Completion Date: 2021-04-09

Initial Gross Weight: 23.599 g  
Density: 0.9421 g/ml

### Water Activity Tested (Water Activity Analyzer)

Specimen Weight: 0.500 g

Dilution Factor: 1.000

| Analyte        | Action Level (aw) | Result (aw) |
|----------------|-------------------|-------------|
| Water Activity | 0.85              | 0.197       |

### Pathogenic Microbiology - A (MicroArray) Passed (Micro Array)

Specimen Weight: 1037.000 mg

Dilution Factor: 1.000

| Analyte            | Result (cfu/g) | Analyte               | Result (cfu/g) |
|--------------------|----------------|-----------------------|----------------|
| Aspergillus flavus | Absence in 1g  | Aspergillus fumigatus | Absence in 1g  |
| Aspergillus niger  | Absence in 1g  |                       |                |

### Listeria Monocytogenes Passed (qPCR)

Specimen Weight: 1019.500 mg

Dilution Factor: 1.000

| Analyte                | Action Level (cfu/g) | Result        |
|------------------------|----------------------|---------------|
| Listeria Monocytogenes | 1                    | Absence in 1g |

*Xueli Gao*  
Xueli Gao Lab Toxicologist  
Ph.D., DABT

*Aixia Sun*  
Aixia Sun Lab Director/Principal Scientist  
D.H.Sc., M.Sc., B.Sc., MT (AAB)

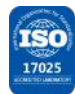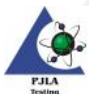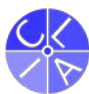

Definitions and Abbreviations used in this report: \*Total CBD = CBD + (CBD-A \* 0.877), \*Total THC = THCA-A \* 0.877 + Delta 9 THC, \*CBG Total = (CBGA \* 0.877) + CBG, \*CBN Total = (CBNA \* 0.877) + CBN, \*Other Cannabinoids Total = CBC + CBDV + THCV + THCV-A, \*Total Detected Cannabinoids = CBD Total + CBG Total + CBN Total + THC Total + CBC + CBDV + THCV + THCV-A, \*Analyte Details above show the Dry Weight Concentrations unless specified as 12% moisture concentration. (mg/ml) = Milligrams per Milliliter, LOQ = Limit of Quantitation, LOD = Limit of Detection, Dilution = Dilution Factor (ppb) = Parts per Billion, (%) = Percent, (cfu/g) = Colony Forming Unit per Gram (cfu/g) = Colony Forming Unit per Gram, , LOD = Limit of Detection, (µg/g) = Microgram per Gram (ppm) = Parts per Million, (ppm) = (µg/g), (aw) = aw (area ratio) = Area Ratio, (mg/Kg) = Milligram per Kilogram, \*Measurement of Uncertainty = +/- 5%

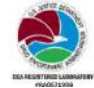

This report shall not be reproduced, without written approval, from ACS Laboratory. The results of this report relate only to the material or product analyzed. Test results are confidential unless explicitly waived otherwise. Accredited by a third-party accrediting body as a competent testing laboratory pursuant to ISO/IEC 17025 of the International Organization for Standardization.



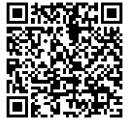

License No. 800025015  
FL License # CMTL-0003  
CLIA No. 10D1094068

## Certificate of Analysis

Compliance Test

**Balanced Health Botanicals (BHB)**  
1500 W. HAMPDEN AVE SUITE 5H  
ENGLEWOOD, CO 80110

Batch # 2210700  
Batch Date: 2021-03-22  
Extracted From: HEMP

Sampling Method: MSP 7.3.1 Test Reg  
State: Florida

Production Date: 2021-03-22

Order # BAL210402-030001  
Order Date: 2021-04-02  
Sample # AABE035

Sampling Date: 2021-04-05  
Lab Batch Date: 2021-04-05  
Completion Date: 2021-04-09

Initial Gross Weight: 23.599 g  
Density: 0.9421 g/ml

### Pathogenic SAE (qPCR)

Specimen Weight: 265.600 mg

Passed (qPCR)

Dilution Factor: 1.000

| Analyte | Action Level (cfu/g) | Result (cfu/g) | Analyte    | Action Level (cfu/g) | Result (cfu/g) |
|---------|----------------------|----------------|------------|----------------------|----------------|
| E.Coli  | 1                    | Absence in 1g  | Salmonella | 1                    | Absence in 1g  |

*Xueli Gao*  
Xueli Gao Lab Toxicologist  
Ph.D., DABT

*Aixia Sun*  
Aixia Sun Lab Director/Principal Scientist  
D.H.Sc., M.Sc., B.Sc., MT (AAB)



Definitions and Abbreviations used in this report: \*Total CBD = CBD + (CBD-A \* 0.877), \*Total THC = THCA-A \* 0.877 + Delta 9 THC, \*CBG Total = (CBGA \* 0.877) + CBG, \*CBN Total = (CBNA \* 0.877) + CBN, \*Other Cannabinoids Total = CBC + CBDV + THCV + THCV-A, \*Total Detected Cannabinoids = CBD Total + CBG Total + CBN Total + THC Total + CBC + CBDV + THCV + THCV-A, \*Analyte Details above show the Dry Weight Concentrations unless specified as 12% moisture concentration. (mg/ml) = Milligrams per Milliliter, LOQ = Limit of Quantitation, LOD = Limit of Detection, Dilution = Dilution Factor (ppb) = Parts per Billion, (%) = Percent, (cfu/g) = Colony Forming Unit per Gram (cfu/g) = Colony Forming Unit per Gram, , LOD = Limit of Detection, (µg/g) = Microgram per Gram (ppm) = Parts per Million, (ppm) = (µg/g), (aw) = aw (area ratio) = Area Ratio, (mg/Kg) = Milligram per Kilogram, \*Measurement of Uncertainty = +/- 5%

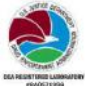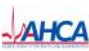

This report shall not be reproduced, without written approval, from ACS Laboratory. The results of this report relate only to the material or product analyzed. Test results are confidential unless explicitly waived otherwise. Accredited by a third-party accrediting body as a competent testing laboratory pursuant to ISO/IEC 17025 of the International Organization for Standardization.

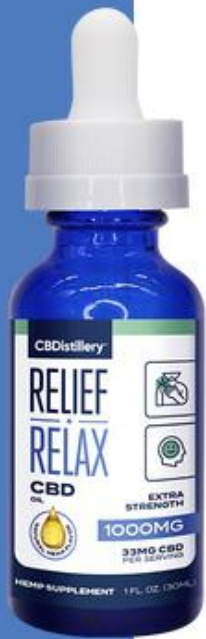

## 0% THC\* Broad Spectrum CBD Oil Tincture 1000mg - 30mL

**Ingredients:** Fractionated Coconut Oil (MCT), Broad Spectrum CBD Hemp Extract (Aerial Parts), Natural Terpenes

**Suggested Use:** Take 1 serving (1mL) orally. Hold under the tongue for 15-20 seconds prior to swallowing. Adjust dosage as needed. Individual results may vary.

**1000mg**

Cannabidiol (CBD) Per Bottle

**33mg**

CBD per 1mL serving
